1           **Antimicrobial resistance of bacteria isolates among**  
2           **patients with chronic wound infections in Tanga Regional**  
3                           **Referral Hospital, Tanzania**

4  
5   Aleena Dawer<sup>1,3\*</sup>, Victor Msengi<sup>2</sup>, Theresia B. Mtui<sup>1,2</sup>, Sarah Sarakikya<sup>2</sup>, Rashid Suleiman<sup>2</sup>,  
6   John P. A. Lusingu<sup>1,3</sup>

7  
8   <sup>1</sup>National Institute of Medical Research Tanga Centre, Tanga, Tanzania

9   <sup>2</sup>Tanga Regional Referral Hospital, Tanga, Tanzania

10   <sup>3</sup>Department of Global Health, Georgetown University, Washington D.C., United States of  
11   America

12  
13   \*Corresponding author

14   Email: [amd429@georgetown.edu](mailto:amd429@georgetown.edu) (AD)

15

16

17

18

19

20

21

22

23

## 24 **Abstract**

25 **Background:** Bacterial wound infections are the second leading cause of mortality globally,  
26 with approximately 50% of contaminated wounds evolving into chronic infections. In  
27 Tanzania, this challenge is exacerbated by the over prescription of antibiotics and the  
28 emergence of drug-resistant bacteria, compounded by inadequate hospital hygiene and  
29 sanitation practices. This study investigated chronic wound infections in Tanga, Tanzania,  
30 focusing on antibiotic susceptibility patterns.

31 **Methods:** A cross-sectional, mixed-methods study was conducted at the Tanga Regional  
32 Referral Hospital (TRRH) from July 2023 to December 2023. Pus and Culture Sensitivity  
33 tests were performed on samples from 89 chronic wound patients to identify bacterial isolates  
34 and assess antibiotic susceptibility. Data was analyzed using STATA, Excel, and Python.

35 **Results:** Of 89 patients, 82 (92.1%) had positive bacterial isolates in wound cultures,  
36 predominantly with *Staphylococcus aureus*, 24 (29.3%). Surgical-site infections (SSI) were  
37 the most prevalent diagnosis, followed by diabetic foot ulcers and septic wounds. Antibiotic  
38 resistance analysis revealed a marked trend in multi-drug resistance (MDR), notably against  
39 amoxicillin, while meropenem was identified as the most effective antibiotic.

40 **Conclusion:** The elevated rate of MDR at TRRH, particularly against commonly used  
41 antibiotics, emphasizes the need for improved antibiotic stewardship and healthcare worker  
42 education. It necessitates increased health awareness about effective wound management and  
43 the development of robust healthcare strategies to combat the escalating challenge of MDR.

### 44 **Keywords:**

45 Chronic bacterial wound infections, Antimicrobial resistance, Healthcare-associated  
46 Infections

47

## 48 Introduction

49 Deaths associated with bacterial wound infections rank as the second leading cause of  
50 global mortality, according to the Global Burden of Diseases Level 3<sup>1</sup>. Alarminglly,  
51 approximately 50% of contaminated bacterial wounds transition into clinical infections<sup>2</sup>. The  
52 World Health Organization (WHO) identified hospital-acquired infections (HAI) as  
53 accounting for 25.1% of all global infections, which were attributed to surgical wounds<sup>3</sup>.  
54 Bacterial pathogens persist as a significant cause of morbidity and mortality worldwide<sup>1</sup>,  
55 posing a consistent challenge in healthcare settings. In developing nations like Tanzania,  
56 bacterial infections pose a grave threat: the incidence of wound infections is estimated to be  
57 as high as 40% as compared to the 3-11% recorded in developed countries<sup>2</sup>.

58 More specifically, *Staphylococcus aureus* (*S. aureus*) is a persistent pathogen  
59 associated with a wide range of infections, from mild skin infections to severe systemic  
60 diseases such as diabetic foot ulcers and osteomyelitis. The prevalence of *S. aureus* is rising  
61 in Tanzania, where it contributes significantly to HAI and antibiotic resistance issues<sup>4</sup>. The  
62 WHO's 2017 report highlighted *S. aureus* as a priority pathogen, emphasizing the need for  
63 focused research and development of new therapeutic options due to its ability to develop  
64 resistance across multiple antibiotic classes rapidly, thereby limiting treatment options<sup>5</sup>.

65 Wound infections are highly prevalent in hospitals and often remain chronic due to  
66 improper healing. A chronic wound infection refers to a wound that fails to progress through  
67 the normal stages of healing, often remaining unhealed for more than three months. These  
68 wounds are characterized by persistent inflammation, delayed closure, and a high risk of  
69 recurring infections. Socio-economic and biological factors contribute to the prevalence of  
70 chronic wound infections, including bacterial resistance to prescribed antibiotics<sup>6</sup>.

71 Antimicrobial resistance (AMR) occurs when bacteria undergo genetic changes that  
72 allow them to withstand the effects of antibiotics that were previously effective. When

73 patients are exposed to multiple doses of antibiotics, resistant bacteria survive and multiply,  
74 displacing the susceptible strains<sup>7</sup>. This resistance makes standard treatments ineffective,  
75 leading to prolonged illness, higher medical expenses, and increased mortality and morbidity.  
76 These resistant bacterial strains have spread across the globe due to the microorganism's  
77 genetic plasticity and mobility.

78 This resistance is particularly high in developing countries, with underlying problems  
79 attributed to economic and societal issues, with effective antimicrobial drugs squandered by  
80 excessive use<sup>8</sup>. Ecological studies support the notion that higher antibiotic usage directly  
81 influences resistance<sup>9</sup>. This especially realms true in developing countries burdened by  
82 bacterial infectious diseases, crowded cities, poor sanitation, and the availability of antibiotics  
83 over the counter (OTC) without a prescription. These medications are often self-prescribed  
84 through unregulated supply chains<sup>10</sup>. Inappropriate antibiotic use, coupled with rapid disease  
85 spread through crowding and sexual contact, contributes to higher AMR rates. However,  
86 recent data remains difficult to interpret due to poor record-keeping and testing coverage in  
87 low- and middle-income countries<sup>11</sup>. As a result, the absence of laboratory diagnostic  
88 facilities has led to the adoption of observational diagnosis in the administration of  
89 antimicrobial medications), resulting in unnecessary and excessive treatments<sup>12</sup>.

90 In Tanzania, challenges include the easy availability of OTC antibiotics and  
91 insufficient healthcare guidance. Commonly used antibiotics in Tanzania, such as amoxicillin  
92 (34.8%), metronidazole (15.4%), tetracycline (13.3%), ciprofloxacin (6.0%), and cefalexin  
93 (4.5%), are becoming increasingly less effective due to their widespread use<sup>13</sup>. Moreover,  
94 antibiotic consumption is predicted to increase by 13-fold over the next twelve years in  
95 Tanzania, signaling an urgent need for action<sup>13</sup>.

96 With escalating post-operative complications and increasing antibiotic resistance in  
97 chronically infected wounds in Tanzania, understanding the bacterial spectrum and factors

98 impairing effective treatment becomes imperative. This rationale rests significantly on the  
99 pressing need to streamline antibiotic stewardship in Tanzania. In line with WHO's Global  
100 Antimicrobial Resistance and Use Surveillance System (GLASS) goals, which aims to foster  
101 standardized AMR data collection and analysis globally - this study contributes valuable  
102 localized data; data which will inform and shape national strategies in the fight against AMR.  
103 Given the lack of research on pre- and post-surgical chronic wound infections in the Tanga  
104 region, this data aligns with the goals of both WHO and the Tanzania National Antimicrobial  
105 Plan 2022-2028<sup>14</sup>.

106 Soaring infection rates within the surgical department is a critical health crisis that  
107 reveals gaps in healthcare stewardship within the management and prescription of wound  
108 infections. This Tanzanian research setting was vital to investigate the antimicrobial  
109 susceptibility profiles of bacterial isolates in chronic wound infections. The study not only  
110 fills existing knowledge gaps but also fosters informative practices where antimicrobial drugs  
111 are used judiciously, effectively mitigating the impact of drug-resistant infections in Tanzania  
112 and the East African region.

113 The research investigated the bacterial isolates and their antibiotic susceptibility  
114 patterns in patients with chronically infected wounds in the surgical ward at Tanga Regional  
115 Referral Hospital (TRRH). The study fulfilled the primary objective of identifying the  
116 bacteria responsible for chronic wound infections and their resistance patterns.

117

## 118 **Materials and Methods**

### 119 **Study aim, design, and selection criteria**

120 This study employed a cross-sectional approach conducted from 30/10/2023 to  
121 03/12/2023, at TRRH. Utilizing quantitative bacterial analysis, wound swab samples were  
122 collected by the healthcare professionals in the surgical/obstetrics-gynecology, emergency,

123 and medical-pediatric wards, employing microscopy Gram stain and culture methods to  
124 identify bacteria and their susceptibility patterns, facilitated through Pus Culture and  
125 Sensitivity tests. The cross-sectional study focused on collecting and analyzing current data,  
126 while the retrospective study reviewed past records to discern patterns and trends related to  
127 wound infections.

128 The selection criteria focused on all admitted patients of all ages and sexes exhibiting  
129 chronic wound infections, while excluding individuals who did not exhibit such conditions.  
130 This criterion was chosen to provide insights into the bacteria characteristics and resistance  
131 patterns prevalent in such clinical settings.

132

### 133 **Sample size and population**

134 The focal point of this study was the diverse group of patients admitted to TRRH with  
135 chronic wounds. This population encapsulated both males and females, who have been  
136 afflicted with chronic wound infections that have significantly affected their quality of life.  
137 The following were the preliminary considerations used in deriving the sample size for the  
138 quantitative study:

139  $N_0 = \square$  Sample size;  $Z = \square$  Confidence level;  $P = \square$  Estimated proportion of chronic wound infections in the  
140 population;  $E = \square$  Desired level of precision;  $Z = \square 1.96$ ,  $P = \square 0.8$  (80%),  $E = \square 0.05$

$$N_0 = Z^2 \frac{P(1 - P)}{E^2}$$

$$N_0 = 1.96^2 \frac{0.8(1 - 0.8)}{0.05^2} = 3.842(0.8) \left( \frac{0.2}{0.0025} \right)$$

141  $N_0 = 246$  patients.

142 Accounting for a potential 10% loss to follow-up or refusal:

143  $0.10 \times 246 = 24.6$ , approximately 25 patients.

144 Finite population correction (Hoyle, 2015):

$$n = N_o + \frac{N_o}{\left(\frac{N_o - 1}{N}\right)} + 1$$

145  $n$  = Adjusted Sample size;  $N$  = Population size (100 patients);

$$n = \frac{271}{\left(\frac{271 - 1}{100}\right)} + 1$$

146

$$n = \frac{271}{3.7} = 73 \text{ patients}$$

147 Preliminary considerations estimated the sample size to be around 73 participants.

148 This estimation is based on trends observed in previous studies conducted in similar settings.

149 An 80% culture positivity rate for wounds was found in the previous three months (May

150 2023-July 2023) at TRRH. Therefore, the actual sample size was 87 patients for quantitative

151 analysis.

152

### 153 **Study setting**

154 The Tanga Regional Referral Hospital (TRRH), famously referred to as Bombo

155 Regional Hospital, is a significant healthcare facility located in Tanga, Tanzania. With a

156 history dating back to the German colonial era of the 1890s, the hospital was initially

157 established in response to the high mortality rate caused by malaria. On average, the hospital

158 admits 28 patients per month for chronic wound infections.

159

### 160 **Sampling strategy**

161 The study adopted a consecutive sampling strategy. All patients meeting the inclusion  
162 criteria during the study period were approached for sample collection until the desired  
163 sample size was achieved from 30/10/2023 to 03/12/2023.

164

## 165 **Ethical Statement**

166 Ethical approval for data collection for this study was obtained from the National  
167 Health Research Ethics Review Committee (NatHREC) in Tanzania, valid from 27/10/2023  
168 to 26/10/2024. The approval (reference: NIMR/HQ/R.8a/Vol.IX/4443) was granted for  
169 conducting research on antimicrobial susceptibility profiles in patients with chronic wound  
170 infections at Tanga Regional Referral Hospital. The study adhered to the ethical principles  
171 outlined in the Belmont Report and the Declaration of Helsinki, and progress reports were  
172 submitted to the Ministry of Health and the National Institute for Medical Research as per  
173 NatHREC guidelines. This study was conducted as part of the ‘GLOH 3950 – Global Health  
174 Practice and Research: An Experiential Learning Course’ at Georgetown University. Under  
175 this framework, local IRB approval (NatHREC) was required and obtained, while  
176 Georgetown IRB approval was not necessary for this research as per university policy. Head  
177 of Surgery at Tanga Regional Referral Hospital, Dr. Rashid Suleiman, collaborated in the  
178 study and granted permission for the work at the hospital level.

179 Retrospective data was collected from hospital medical records and laboratory reports  
180 covering the period 01/07/2023 to 30/10/2023. This data was accessed and analyzed  
181 between 30/10/2023 and 03/12/2023, following ethical approval. The data collection was  
182 conducted collaboratively, with Dr. Victor Msengi (Tanga Regional Referral Hospital)  
183 leading the process. Dr. Msengi anonymized all patient data before providing it to the  
184 research team, ensuring that no identifying information was accessible to the authors during  
185 or after data collection. The anonymized data included patient demographics, diagnoses,

186 treatment history, and bacterial isolate profiles. All data handling adhered to the ethical  
187 requirements outlined by NatHREC to ensure patient confidentiality, and no attempts were  
188 made to re-identify participants.

189 As for prospective data collection, participants were recruited from the Tanga  
190 Regional Referral Hospital between 30/10/2023 and 03/12/2023. Eligible participants  
191 included individuals with chronic wound infections who provided consent to participate in  
192 the study. Written informed consent was obtained from all participants prior to inclusion in  
193 the study. Consent forms were available in both English and Swahili to ensure  
194 comprehension. The consent process was facilitated by Nurse Theresia Mtui, a native Swahili  
195 speaker, who distributed and explained the consent forms to participants to ensure their full  
196 understanding. No participants were recruited without written consent.

## 197 **Inclusivity in global research**

198 Additional information regarding the ethical, cultural, and scientific considerations  
199 specific to inclusivity in global research is included in the Supporting Information.

200

## 201 **Data Collection Tools and Procedures**

### 202 **Primary cultures**

203 The primary goal of collecting pus samples from the wounds was to investigate the  
204 antibacterial susceptibility of the isolates present in chronic wound infections. Before  
205 collecting the pus sample, the wound sites were cleaned carefully to avoid contamination.  
206 Trained hospital staff collected pus samples using sterilized swabs, ensuring the safe and  
207 hygienic handling of samples. The collected samples were immediately transported to the  
208 laboratory in a secure transport medium to prevent any alterations in the bacterial properties.  
209 Upon receipt, swab specimens collected from the patients were systematically recorded,

210 marking the initiation of the laboratory investigation process. This step ensures traceability  
211 and proper management of the sample data. Patient records were utilized to supplement the  
212 swab test data, filling in missing variables and providing basic clinical information such as  
213 age, gender, and clinical diagnosis. All patient information was handled in compliance with  
214 privacy and data protection regulations.

215

## 216 **Antibacterial Susceptibility Testing**

217       Upon arrival to the laboratory, the samples underwent a Gram stain procedure to  
218 categorize the bacteria into Gram-positive and Gram-negative groups. Examples of Gram-  
219 positive bacteria include *Staphylococcus aureus* and *Streptococcus pneumoniae*, while  
220 *Escherichia coli* and *Salmonella enterica* are examples of Gram-negative bacteria. The  
221 samples were then cultured on Mueller-Hinton (MH) agar plates, setting the stage for the  
222 Kirby-Bauer disk diffusion test. The research employed antibacterial susceptibility testing  
223 using the discs recommended by the Clinical and Laboratory Standards Institute (CLSI)  
224 guidelines<sup>15</sup>. The study targeted both aerobic and anaerobic bacteria, given the nature of  
225 chronic wound infections, which can often be polymicrobial with both types present.

226 **Preparation:** 6-mm filter paper disks loaded with known concentrations of antimicrobial  
227 compounds were placed on the inoculated MH agar plates.

228 **Incubation:** The plates were incubated at a controlled temperature of  $35^{\circ}\text{C} \pm 2^{\circ}\text{C}$ , facilitating  
229 bacterial growth and antimicrobial diffusion simultaneously. This process helped in  
230 establishing the zones of inhibition, where bacterial growth is curtailed by the antimicrobial  
231 agent.

232 **Observation:** After 24 hours, the zone of inhibition around each disk were observed. This  
233 zone size indicates susceptibility or resistance to the antimicrobial compound.

234 **Recording and Interpretation:** The zones of inhibition were measured, and based on the  
235 zone size, the isolates were categorized as susceptible (S), intermediate (I), or resistant (R) to  
236 the specific antimicrobial agents. This classification is done using a standardized  
237 interpretation chart based on guidelines provided by the Kirby-Bauer Disk Diffusion  
238 Susceptibility Test Protocol<sup>16</sup> and TRRH's CLSI guidelines<sup>15</sup>.

239

## 240 **Reporting**

241 **Data compilation:** The data accumulated were meticulously recorded, documenting the  
242 susceptibility patterns of the isolates. The findings were communicated back to the clinical  
243 team, assisting them in making informed decisions regarding patient care and treatment  
244 strategies.

245

## 246 **Data analysis**

247 Data analysis involved a comprehensive examination of the patterns of bacterial  
248 susceptibility and resistance. Patient records were anonymized. Statistical software was  
249 employed to analyze the data, focusing on the correlation between bacterial types, resistance  
250 patterns, and patient demographics. Data analysis was primarily conducted using STATA  
251 version 18. Microsoft Excel was employed for initial data organization and preliminary  
252 analysis. Lastly, Python played a role in the data analysis process and data visualization. This  
253 combination of STATA, Microsoft Excel, and Python provided a robust, multi-layered  
254 approach to data analysis, ensuring both the reliability and depth of the findings.

255

## 256 **Results**

257 Of the 89 eligible patients, 82 had a positive wound culture (92.1%). 58.5% of these  
258 patients were male and 41.5% female. Fig 1 shows the frequency of wound infections among  
259 all age groups and sex, with a median age of 39 years and an overall range from 0-83 years.  
260 The median age for females were 35 years, with an overall range from 1-75 years. The  
261 median age for males were 39.5 years, with an overall range from 0-83 years. This suggests  
262 that wound infections were most prevalent in middle-aged patients during the study period.  
263 Most wounds were located at the lower limb, accounting for nearly 60% of all cases (n = 52).  
264 Primary diagnoses are shown in Table 1, in which 20% are attributed to surgical-site  
265 infections. However, these findings indicate a notable portion of records where wound  
266 locations were not adequately recorded.

267

268 **Fig 1. Frequency of wound bacterial infections by age and sex at TRRH.**

269

270 **Table 1. Primary diagnoses of TRRH patients: July-November 2023 with Pus C&S**

271 **Tests.**

| <b>Primary Diagnosis</b> | <b>Percent</b> |
|--------------------------|----------------|
| Surgical-Site Infection  | 20.9%          |
| Diabetic Foot Ulcer      | 18.6%          |
| Otitis Media             | 12.8%          |
| Chronic Osteomyelitis    | 11.6%          |
| Septic Wound             | 10.5%          |
| Necrotizing Infections   | 8.2%           |

|                    |      |
|--------------------|------|
| Not Recorded       | 5.8% |
| Abscess            | 3.5% |
| Urosepsis          | 3.5% |
| Pyomyositis        | 2.3% |
| Pyogenic Arthritis | 2.3% |

272

273           The majority of patients had a single bacterial isolate identified in their wound (Fig  
274 2). 80.0% of the bacterial isolates consisted of either *S. aureus*, *Citrobacter spp*, *K.*  
275 *pneumoniae*, *P. mirabilis*, *P. aeruginosa*, *E. coli* or *P. vulgaris* (Fig 2). Among the 13 distinct  
276 species identified, *S. aureus* emerged as the most prevalent, constituting nearly 29.0% of the  
277 isolates (n = 24). This prevalence underscores the significance of *S. aureus* in wound  
278 infections due to its known pathogenicity, relevance in HAI and its potential impact on  
279 treatment outcomes. *Citrobacter spp*, *P. mirabilis*, and *K. pneumoniae* are also notably  
280 present, each accounting for approximately 9.0% to 14.0% of the isolates, reflecting their role  
281 in clinical settings.

282

283 **Fig 2. Distribution of bacteria isolates identified from samples at TRRH.**

284

285           The Surgical Department accounted for a substantial majority of pus wound swabs  
286 (54.0%), indicative of the nature of surgical procedures, where the risk of wound infections is  
287 inherently higher due to invasive procedures and open wounds. The Emergency Medicine  
288 Department (EMD) contributed 14 swabs, making up 16.6% of the total infections. The  
289 urgency and varied nature of cases in emergency settings could explain this significant  
290 proportion. This finding highlights the areas where wound-related complications are most  
291 prevalent, guiding resource allocation and the focus of infection control initiatives.

292 The analysis of patient diagnoses indicated a substantial prevalence of comorbid  
293 conditions. Nearly half of the patient cohort, approximately 46.0%, were documented with  
294 multiple medical diagnoses, as opposed to a solitary primary condition. For the prevalent  
295 diagnoses of patients with infections, SSI (20.9%) and diabetic foot ulcers (18.6%) were the  
296 most common diagnoses, followed by otitis media (12.8%). Secondary and tertiary diagnoses  
297 included conditions such as diabetes mellitus, hypertension, fractures, and cellulitis. This  
298 highlights the variety of conditions leading to the need for such tests within the patient  
299 population.

300 The analysis of antibiotic resistance patterns in the top five bacterial isolates; *S.*  
301 *aureus*, *Citrobacter spp*, *K. pneumoniae*, *P. mirabilis*, and *P. aeruginosa*, (Fig 3) revealed a  
302 concerning trend in MDR. In the analysis, focus was placed on *S. aureus* due to its unique  
303 high resistance profile. Notably, amoxicillin was found to be almost universally ineffective,  
304 resisting 100.0% of all tested bacteria except *S. aureus*, exemplifying its limitation in clinical  
305 utility for this regional hospital. Similarly, cephalosporins such as ceftazidime, ceftriaxone,  
306 and cefazolin exhibited high levels of resistance in *Citrobacter*, *K. pneumonia*, and *P.*  
307 *mirabilis*, suggesting a widespread cephalosporin-resistant profile in these isolates.

308

309 **Fig 3. Antibiogram heatmap of resistance profiles of top five bacterial isolates at TRRH.**

310

311 *P. aeruginosa* had a unique pattern with complete resistance to several antibiotics,  
312 including amoxicillin, tobramycin, and augmentin, while being entirely susceptible to others  
313 like gentamycin, ciprofloxacin, and meropenem. This indicates a selective but profound AMR  
314 characteristic of this pathogen. On the other hand, meropenem emerged as the most effective  
315 antibiotic across the majority of the isolates, suggesting its potential as a first-line treatment  
316 option.

317 The resistance data, when viewed through the lens of the tier system<sup>15</sup>, underscores  
318 the necessity of strategic antibiotic selection in combating *S. aureus* infections. Tier 1  
319 Antibiotics, considered primary for routine testing, showed varied effectiveness. For instance,  
320 cefoxitin demonstrated significant resistance (47.1%), indicating a possible prevalence of  
321 methicillin-resistant *S. aureus* (MRSA) in the isolate pool. Erythromycin exhibited an 85.7%  
322 resistance rate, suggesting limited utility in treatment. While clindamycin (38.9% resistance)  
323 might still be effective in certain clinical cases. The susceptibility of *S. aureus* to antibiotics  
324 such as meropenem, cefazolin, and tobramycin highlights effective alternative options within  
325 the local context of TRRH, especially for managing MDR strains. Additionally, the  
326 effectiveness of less commonly used antibiotics like chloramphenicol and nalidixic acid  
327 offers valuable insights for local antibiotic guidelines, particularly in resource-limited  
328 settings, reflecting unique resistance dynamics shaped by regional prescribing practices and  
329 bacterial exposure patterns in Tanga.

330 Tier 2 Antibiotics, used when Tier 1 antibiotics are not effective, like tetracycline  
331 showed varying resistance (38.5%). This suggests this antibiotic could be effective in MRSA  
332 cases. Other Tier 2, 3 and 4 antibiotics, reserved for high-risk MDR patients, did not appear  
333 in TRRH laboratory testing but are crucial for consideration, given their role in treating *S.*  
334 *aureus*.

335

## 336 Discussion

337 These findings, underscores the complexity inherent to the patient cases encountered  
338 within the clinical setting. The implications of this data are manifold. First, it suggests that  
339 patients present with multifaceted health challenges, which necessitate a nuanced approach to  
340 treatment that extends beyond the scope of a single diagnosis. The coexistence of secondary  
341 and tertiary diagnoses alongside primary conditions, such as diabetes paired with wound

342 infections, signals the need for integrated care pathways and a multidisciplinary approach to  
343 healthcare delivery. Furthermore, the high incidence of additional diagnoses may also reflect  
344 the interconnected nature of diseases, where one condition potentially predisposes individuals  
345 to further health complications. This pattern highlights the importance of comprehensive  
346 patient assessments to ensure that all underlying conditions are identified and addressed in  
347 the treatment plan.

348         Similar to previous research findings, globally, this study's bacterial isolate profile  
349 findings have significant overlaps. Previous research studies also found that *S. aureus*<sup>17</sup> was  
350 the most prevalent bacteria. This study documented *Citrobacter spp*, *Proteus mirabilis* and *K.*  
351 *pneumoniae* as notable contributors to wound infections as well. *P. aeruginosa* was similar in  
352 that it was one of the higher resistant isolates<sup>18</sup>. This study also found that meropenem was  
353 effective in bacterial isolates<sup>19</sup>.

354         This study's results align with other studies<sup>20,21</sup> done in Tanzania and Sierra Leone,  
355 showing that high Extended Spectrum  $\beta$ -lactamase production among Gram-negative rods  
356 contributes to widespread resistance, especially in *Citrobacter spp*, *K. pneumoniae*, and *P.*  
357 *mirabilis*. There is a clear pattern of increasing resistance to commonly used antibiotics like  
358 amoxicillin, cotrimoxazole, and cephalosporins in both studies. This trend raises concerns  
359 about the overuse and accessibility of these drugs leading to escalated bacterial resistance.

360         The high levels of resistance to multiple antibiotics, particularly in *S. aureus*,  
361 *Citrobacter spp*, *K. pneumoniae*, and *P. mirabilis*, are indicative of a burgeoning MDR crisis.  
362 These findings underscore the urgency for tailored antibiotic stewardship and the  
363 development of novel antimicrobial strategies. They also highlight the critical need for  
364 ongoing surveillance and research into antibiotic resistance patterns, which is essential for  
365 guiding effective clinical interventions and curbing the rise of MDR pathogens.

366           The overwhelming prevalence of swabs in the surgical department underlines the  
367 need for robust infection control measures and efficient wound management strategies in  
368 these departments. Moreover, fewer than 15.0% of swabs originated from outpatient settings.  
369 This finding supports previous research indicating a greater incidence of infections among  
370 inpatients as compared to outpatients<sup>18</sup>.

371           Compounding this concern is the prevalence of specific categories of infections  
372 observed in this study. As noted previously, SSI were found to be the most prevalent at  
373 20.9%, closely followed by diabetic foot ulcers at 18.6%, echoing findings from previous  
374 research. For instance, Gosling<sup>22</sup>, identified HAI, particularly in surgical and orthopedic  
375 wards, as one of the most frequent complications, accounting for 36.7% of cases in their  
376 study titled '*Prevalence of hospital-acquired infections in a tertiary referral hospital in*  
377 *northern Tanzania*'. This correlation suggests a persistent challenge in managing SSIs across  
378 various healthcare settings. Another study's findings<sup>2</sup> on the high prevalence of polymicrobial  
379 infections in diabetic wounds, particularly involving Gram-negative rods, complement this  
380 research's findings on the high incidence of diabetic foot ulcers.

381           In addition to the focus on specific categories of infections, the analysis of patient  
382 diagnoses in this study reveals a substantial prevalence of comorbid conditions. Nearly half  
383 of the patient cohort (46.0%) were documented with multiple medical diagnoses. Similar  
384 complexity has been noted in other studies, such as research on Tanzanian adults with  
385 hypertension-related diseases who used herbal treatments. In this study, 81.2% of patients  
386 presented with multiple health conditions<sup>23</sup>. The parallel between these findings underlines  
387 the multifaceted nature of patient health in hospital settings, where individuals often face  
388 surgical complications and other comorbid conditions, necessitating a comprehensive and  
389 integrated approach to healthcare.

390           The overconsumption of antibiotics and its heightened resistance also negatively  
391 impacts the economy. With increased resistance, there is an elevated cost for more expensive  
392 antibiotics, specialized equipment, longer hospital stays, and isolation procedures for  
393 patients<sup>24</sup>. Many patients are now resistant to first-line antimicrobials and must switch to  
394 second or third-line options, imposing a considerable strain on healthcare systems. These  
395 escalating costs might heighten the financial burden on individuals and communities,  
396 potentially leading to increased healthcare inequities<sup>25</sup>. This economic pressure could impede  
397 progress in improving global health outcomes, making it imperative to address antibiotic  
398 resistance with urgency and coordinated efforts across East Africa.

399

## 400 **Limitations**

401           The study encountered limitations in its sample selection, specifically focusing on  
402 patients admitted to the hospital. This approach, by design, excluded the analysis of patients  
403 outside the hospital setting, potentially introducing a bias to the findings. Future studies with  
404 a more inclusive and diverse participant sample are recommended to ensure a more  
405 comprehensive understanding. For bacterial analysis, collection of swab samples was  
406 confined to patients with the financial means to afford the test costs. This financial barrier  
407 resulted in a potential overlook of a more diverse spectrum of patients from various  
408 socioeconomic backgrounds.

409           Another limitation was the unavailability of a full spectrum of antibiotics for testing  
410 in the laboratory due to resource constraints. To maintain laboratory protocol, testing was  
411 guided by Clinical and Laboratory Standards Institute (CLSI) guidelines, which recommend  
412 specific antibiotics for different bacterial isolates, leading to some variability in the  
413 antibiotics tested across samples. Future studies should secure sufficient funding to ensure

414 that testing costs are not a hindrance. By doing so, future research can provide a more  
415 inclusive dataset, capturing a wider range of patient bacterial profiles and thereby enriching  
416 the understanding of the subject matter. Moreover, while swabbing is a commonly used, non-  
417 invasive, and cost-effective method for specimen collection, it does have inherent drawbacks.  
418 Inadequate specimen collection has the potential to skew results. However, in this study, this  
419 potential limitation was reduced by thoroughly cleansing the wound before swab collection,  
420 thereby reducing the likelihood of such contamination.

421 Lastly, the small sample size limited the capacity to perform advanced statistical  
422 analyses that could have enhanced the study's robustness. Regarding generalizability, the  
423 findings provide localized data specific to TRRH rather than reflecting broader population  
424 trends, which may limit external validity. Additionally, due to the study's limited resources,  
425 the data does not differentiate between community-associated and healthcare-associated  
426 infections. Limited information from healthcare providers about patients' prior antibiotic use,  
427 particularly OTC purchases before seeking hospital care, further constrained additional  
428 extrapolative analysis. This limitation complicates understanding the timing of antibiotic use,  
429 as many patients potentially self-medicate prior to seeking professional care. Future studies  
430 might address this by including community data and capturing antibiotic purchase histories to  
431 improve the context of AMR patterns.

432

## 433 **Recommendations**

434 The high prevalence of inadequate care is deeply intertwined with broader social  
435 determinants of health, including poverty, education, and social stratification. These factors  
436 collectively play a pivotal role in shaping healthcare accessibility and quality. In light of these  
437 findings, the study proposes two main recommendations. These recommendations are  
438 designed to be practical and actionable, addressing the urgent needs identified in the research.

439 Their implementation possesses the potential to significantly improve patient outcomes,  
440 alleviate the burden of AMR and enhance overall quality of healthcare delivery in the region.

441

#### 442 **Strengthening surveillance on antibiotic resistance:**

443 Enhancing surveillance systems and research efforts is crucial for understanding and  
444 monitoring the trends and patterns of antibiotic resistance. This would aid in developing  
445 targeted strategies to mitigate the spread of MDR pathogens. This recommendation involves  
446 expanding the capability of both hospital-based and community-based surveillance networks  
447 to accurately track trends and patterns of antibiotic resistance. The logistics of this  
448 enhancement would include equipping hospitals and community health centers with the  
449 necessary technology and training staff to collect, analyze, and report data on antibiotic use  
450 and resistance patterns. This data would provide a clearer picture of the resistance landscape,  
451 enabling more targeted and effective interventions.

452 Another key element in this strategy is fostering collaboration between academic  
453 institutions, healthcare facilities, and government health agencies. This collaborative effort  
454 would focus on conducting in-depth research to understand the causes, mechanisms, and  
455 spread of MDR. By pooling resources and expertise, these institutions can undertake more  
456 comprehensive and sophisticated research projects. Such collaboration could involve sharing  
457 samples, data, and research findings, as well as jointly applying for research grants and  
458 funding. This cooperative approach would not only enhance the quality of the research, but  
459 also expedite the process of gaining critical insights into antibiotic resistance.

460 Establishing a system for regular data sharing and reporting among healthcare  
461 facilities and public health agencies is crucial. This system would facilitate a coordinated  
462 response to MDR challenges by providing all stakeholders with timely and accurate  
463 information. This could be achieved through the creation of a centralized database accessible

464 to relevant parties, where data on antibiotic use and resistance can be regularly updated and  
465 analyzed. Regular meetings and conferences could also be organized to discuss findings,  
466 share best practices, and coordinate efforts.

467         Based on the surveillance data and research findings, targeted public health  
468 interventions can be implemented. These interventions might include infection control  
469 measures in hospitals and public awareness campaigns about the importance of responsible  
470 antibiotic use. Tailoring these interventions to specific communities based on the data  
471 collected ensures that they are as effective as possible. Moreover, these interventions would  
472 need to be dynamic, adapting to the evolving nature of antibiotic resistance.

473         As mentioned prior, the GLASS-AMR WHO action plan calls for nations to develop  
474 standardized AMR data collection and analysis based on regional data. The findings from the  
475 Tanga region study directly support this goal, offering insights that are region-specific and  
476 therefore more relevant and actionable for local health authorities. The Tanzania National  
477 Antimicrobial Plan 2022-2028 also emphasizes the need for localized research and data to  
478 inform its strategies against AMR. This alignment significantly enhances the potential for  
479 securing funding, as the study's objectives align with those of major global and national  
480 health initiatives. Securing funding for the proposed enhancements in surveillance systems,  
481 research collaborations, and public health interventions becomes more feasible when the  
482 research is aligned with these larger global and national initiatives.

### 483 **Development of community-based health programs:**

484         Transitioning from the broader context of AMR to the more focused realm of wound  
485 infection management, the development of community-based health programs emerges as a  
486 crucial recommendation. These programs, aimed at early detection and management of  
487 wound infections, should be made accessible and affordable to all patients, regardless of their  
488 socioeconomic status. This accessibility can be facilitated through subsidies from government

489 or non-governmental organizations. The program would implement mobile clinics in rural  
490 and underserved areas within Tanzania. These clinics will provide essential services such as  
491 basic wound care, education on wound management, and early detection of potential  
492 complications. Their mobility ensures that healthcare reaches those who are geographically  
493 isolated or lack access to traditional healthcare facilities. Complementing mobile clinics,  
494 regular health workshops in local communities are crucial. These workshops will serve as  
495 platforms to educate residents about the importance of proper wound care and the role of  
496 nutrition in the healing process. By raising awareness, these workshops can empower  
497 individuals to take proactive steps in managing their health and seeking timely medical  
498 intervention.

499 An integral part of this recommendation is the training and deployment of community  
500 HCWs. This aspect is particularly crucial in light of the disparities in HCW knowledge  
501 observed in the study. These HCWs, equipped with the necessary skills and knowledge, can  
502 conduct home visits to patients who are immobile or lack access to healthcare facilities. Their  
503 role extends beyond providing basic wound care; they are also educators and advisors to  
504 patients and their families. They can impart crucial knowledge about wound management and  
505 prevention strategies, ensuring that even the most vulnerable sections of the community have  
506 access to healthcare information. These community health workers would act as a vital link  
507 between the patients and the healthcare system. They can identify cases that require more  
508 advanced medical attention and facilitate referrals to hospitals, ensuring that patients receive  
509 comprehensive care.

510

## 511 **Conclusions**

512 The study emphasized the urgent challenge of AMR, especially among pathogens  
513 such as *S. aureus*, *Citrobacter spp*, *K. pneumoniae*, and *P. mirabilis*. Addressing this issue

514 requires immediate action in antibiotic stewardship and the development of novel treatment  
515 strategies. The study revealed significant MDR and high infection rates particularly in the  
516 surgical ward. However, it also identifies opportunities for targeted interventions,  
517 emphasizing the need for enhanced public health and healthcare worker education, improved  
518 healthcare infrastructure, and integrated approaches that respect cultural contexts.

519 This study's unique contribution lies in its exploration of AMR at a Tanzanian  
520 regional referral hospital, highlighting critical areas for intervention and improvement in  
521 healthcare strategies. These insights are especially vital in settings where resource constraints  
522 significantly influence health management. The recommendations proposed herein aim to  
523 improve patient outcomes, reduce the burden of AMR, and enhance the overall quality of  
524 healthcare delivery in the local context. In doing so, they contribute to the global effort in  
525 managing and preventing chronic wound infections.

## 526 **Declarations**

### 527 **Ethics approval and consent to participate**

528 The proposed study is grounded in the ethical principles of beneficence, non-maleficence,  
529 and respect for autonomy. The anticipated benefits of the study, which include enhancing  
530 knowledge about chronic wound infections and potentially developing more effective  
531 treatment strategies, justify the ethical conduct of the study. The study protocol was endorsed  
532 through rigorous scientific ethical review by the National Institute of Medical Research  
533 (NIMR) (ethical approval NIMR/HQ/R.8a/Vol. IX/4443 granted on 27/10/2023). All  
534 participants signed a written informed consent prior to inclusion. All methods were  
535 performed in accordance with the relevant guidelines and regulations.

### 536 **Consent for publication**

537 I hereby provide consent for the publication of the manuscript detailed above, including any  
538 accompanying images or data contained within the manuscript.

539 **Availability of data and materials**

540 The datasets used and/or analysed during the current study are available in the Dryad  
541 repository. The data can be accessed at the following

542 DOI: [http://datadryad.org/stash/share/o8XJQKJH7tVM6SnBA5wY0K9-  
543 nV9S5VZc0MCY52h24V4](http://datadryad.org/stash/share/o8XJQKJH7tVM6SnBA5wY0K9-nV9S5VZc0MCY52h24V4).

544 **Competing interests**

545 The authors declare that they have no competing interests.

546 **Funding**

547 This research was funded by Georgetown University's Global Health Department.

548 **Authors' contributions**

549 Principal investigator: AD; Study design: AD, JPAL, VM; Data collection: TM, VM, AD;  
550 Laboratory procedures: SS, TM; Data analysis: AD, JPAL; Approved hospital use: RS; wrote  
551 draft of manuscript: AD; and reviewed and approved the final draft of the manuscripts: JPAL,  
552 AD, VM, SS, TM, RS.

553 **Acknowledgments**

554 We thank all patients, laboratory scientists & medical microbiologists and medical staff at  
555 Tanga Regional Referral Hospital, Tanzania and the Institute of Medical Research for their  
556 assistance and continuous support.

557

558

## References

- 559 [1] World Health Organization. Report signals increasing resistance to antibiotics in  
560 bacterial infections in humans and need for better data. WHO 2022b.  
561 <https://www.who.int/news/item/09>
- 562 [2] Kassam, N.A., Damian, D.J., Kajeguka, D. et al. Spectrum and antibiogram of  
563 bacteria isolated from patients presenting with infected wounds in a Tertiary Hospital,  
564 northern Tanzania. BMC Res Notes 2017; 10, 757. [https://doi.org/10.1186/s13104-](https://doi.org/10.1186/s13104-017-3092-9)  
565 [017-3092-9](https://doi.org/10.1186/s13104-017-3092-9)
- 566 [3] Tikhomirov, E. WHO programme for the control of hospital infections.  
567 Chemioterapia 1987; 6(3), 148–151.
- 568 [4] Mzee T, Kazimoto T, Madata J, et al. Prevalence, antimicrobial susceptibility and  
569 genotypic characteristics of *Staphylococcus aureus* in Tanzania: a systematic  
570 review. *Bull Natl Res Cent.* 2021;45:162. doi:10.1186/s42269-021-00612-z
- 571 [5] World Health Organization. Global priority list of antibiotic-resistant bacteria to  
572 guide research, discovery, and development of new antibiotics. Geneva: WHO; 2017.  
573
- 574 [6] Ventola C. L. The antibiotic resistance crisis: part 1: causes and threats. P & T  
575 2015; 40(4), 277–283.
- 576 [7] Habboush Y, Guzman N. Antibiotic resistance. [Updated 2023 Jun 20]. In:  
577 StatPearls. Treasure Island (FL): StatPearls Publishing; 2024  
578 Jan. <https://www.ncbi.nlm.nih.gov/books/NBK513277/>

- 579 [8] Kunin C. M. Resistance to antimicrobial drugs--a worldwide calamity. Ann.  
580 Intern. Med. 1993; 118(7), 557–561. [https://doi.org/10.7326/0003-4819-118-7-](https://doi.org/10.7326/0003-4819-118-7-199304010-00011)  
581 [199304010-00011](https://doi.org/10.7326/0003-4819-118-7-199304010-00011)
- 582 [9] Goossens H. Antibiotic consumption and link to resistance. CMI: ESCMID 2009;  
583 15 Suppl 3, 12–15. <https://doi.org/10.1111/j.1469-0691.2009.02725.x>
- 584 [10] Ayukekbong, J.A., Ntemgwa, M. & Atabe, A.N. The threat of antimicrobial  
585 resistance in developing countries: causes and control strategies. Antimicrob Resist  
586 Infect Control 2017; 6, 47. <https://doi.org/10.1186/s13756-017-0208-x>
- 587 [11] World Health Organization. Global antimicrobial resistance and use surveillance  
588 system (GLASS) report: 2022a.  
589 <https://www.who.int/publications/i/item/9789240062702>
- 590 [12] Wall S. Prevention of antibiotic resistance - an epidemiological scoping review to  
591 identify research categories and knowledge gaps. GHA 2019; 12(1), 1756191.  
592 <https://doi.org/10.1080/16549716.2020.1756191>
- 593 [13] Sangeda, R. Z., Saburi, H. A., Masatu, F. C., et. al. National antibiotics utilization  
594 trends for human use in Tanzania from 2010 to 2016 inferred from Tanzania  
595 medicines and medical devices authority importation data. Antibiotics 2021; (Basel,  
596 Switzerland), 10(10), 1249. <https://doi.org/10.3390/antibiotics10101249>
- 597 [14] Ministry of Health, United Republic of Tanzania. The United Republic of  
598 Tanzania National Action Plan on Antimicrobial Resistance 2023-2028. World Health  
599 Organization; 2023. Available from: [https://cdn.who.int/media/docs/default-](https://cdn.who.int/media/docs/default-source/antimicrobial-resistance/amr-spc-npm/nap-library/the-united-republic-of-tanzania---national-action-plan-2023--2028.pdf?)  
600 [source/antimicrobial-resistance/amr-spc-npm/nap-library/the-united-republic-of-](https://cdn.who.int/media/docs/default-source/antimicrobial-resistance/amr-spc-npm/nap-library/the-united-republic-of-tanzania---national-action-plan-2023--2028.pdf?)  
601 [tanzania---national-action-plan-2023--2028.pdf?](https://cdn.who.int/media/docs/default-source/antimicrobial-resistance/amr-spc-npm/nap-library/the-united-republic-of-tanzania---national-action-plan-2023--2028.pdf?)

- 602 [15] CLSI Clinical & Laboratory Standards Institute. CLSI M100 performance  
603 standards for antimicrobial susceptibility testing. 33rd ed. CLSI 2022.  
604 <https://clsi.org/standards/products/microbiology/documents/m100/>
- 605 [16] Hudzicki, J. Kirby-Bauer Disk Diffusion Susceptibility Test Protocol. ASM  
606 2009.
- 607 [17] Mnyambwa NP, Mahende C, Wilfred A, Sandi E, Mgina N, Lubinza C, et al.  
608 Antibiotic susceptibility patterns of bacterial isolates from routine clinical specimens  
609 from referral hospitals in Tanzania: a prospective hospital-based observational  
610 study. *Infect Drug Resist.* 2021;14:869-878. doi:10.2147/IDR.S294575. PMID:  
611 33688222; PMCID: PMC7937390.
- 612 [18] Dekker, D., Pankok, F., Thye, T., Taudien, S., Oppong, K., Akenten, et. al. Clonal  
613 clusters, molecular resistance mechanisms and virulence factors of Gram-Negative  
614 bacteria isolated from chronic wounds in Ghana. *Antibiotics* 2021; (Basel,  
615 Switzerland), 10(3), 339. <https://doi.org/10.3390/antibiotics10030339>
- 616 [19] Agyepong, N., Govinden, U., Owusu-Ofori, A., & Essack, S. Y. Multidrug-  
617 resistant gram-negative bacterial infections in a teaching hospital in Ghana.  
618 *Antimicrob Resist Infect Control* 2018; 7, 37. [https://doi.org/10.1186/s13756-018-](https://doi.org/10.1186/s13756-018-0324-2)  
619 [0324-2](https://doi.org/10.1186/s13756-018-0324-2)
- 620 [20] Mloka, D., Sangeda, R. Z., Mwambete, K. D., & Kamuhabwa, A. R. Magnitude  
621 of Extended-Spectrum Beta-Lactamase-Producing Gram-Negative and Beta-  
622 Lactamase-Producing Gram-Positive pathogens isolated from patients in Dar es  
623 Salaam, Tanzania: A cross-sectional study. *Cureus* 2022; 14(4), e24451.  
624 <https://doi.org/10.7759/cureus.24451>

- 625 [21] Schaumburg, F., Vas Nunes, J., Mönnink, G., Falama, A. M., Bangura, et. al.  
626 Chronic wounds in Sierra Leone: pathogen spectrum and antimicrobial susceptibility.  
627 Infection 2022; 50(4), 907–914. <https://doi.org/10.1007/s15010-022-01762-6>
- 628 [22] Gosling, R., Mbatia, R., Savage, A., Mulligan, J. A., & Reyburn, H. Prevalence  
629 of hospital-acquired infections in a tertiary referral hospital in northern Tanzania. Ann  
630 Trop Med Parasitol 2003; 97(1), 69–73. <https://doi.org/10.1179/000349803125002724>
- 631 [23] Liwa, A., Roediger, R., Jaka, H., et. al. Herbal and alternative medicine use in  
632 Tanzanian adults admitted with hypertension-related diseases: A mixed-methods  
633 study. Int. J. Hypertens 2017; Article 5692572. <https://doi.org/10.1155/2017/5692572>
- 634 [24] Prestinaci, F., Pezzotti, P., & Pantosti, A. Antimicrobial resistance: a global  
635 multifaceted phenomenon. PGH 2015; 109(7), 309–318.  
636 <https://doi.org/10.1179/2047773215Y.0000000030>
- 637 [25] Janssen, J., Afari-Asiedu, S., Monnier, A. et al. Exploring the economic impact of  
638 inappropriate antibiotic use: the case of upper respiratory tract infections in Ghana.  
639 Antimicrob Resist Infect Control 2022; 11, 53. [https://doi.org/10.1186/s13756-022-](https://doi.org/10.1186/s13756-022-01096-w)  
640 [01096-w](https://doi.org/10.1186/s13756-022-01096-w)
